# Supplementary material
Source: ML conference proceedings conference paper supplement (https://openreview.net/forum?id=uO2WfDYfeK)
Supplement: supplementary_material [file attachment]

# SUPPLEMENTARY MATERIALS

**Anonymous authors**

Paper under double-blind review

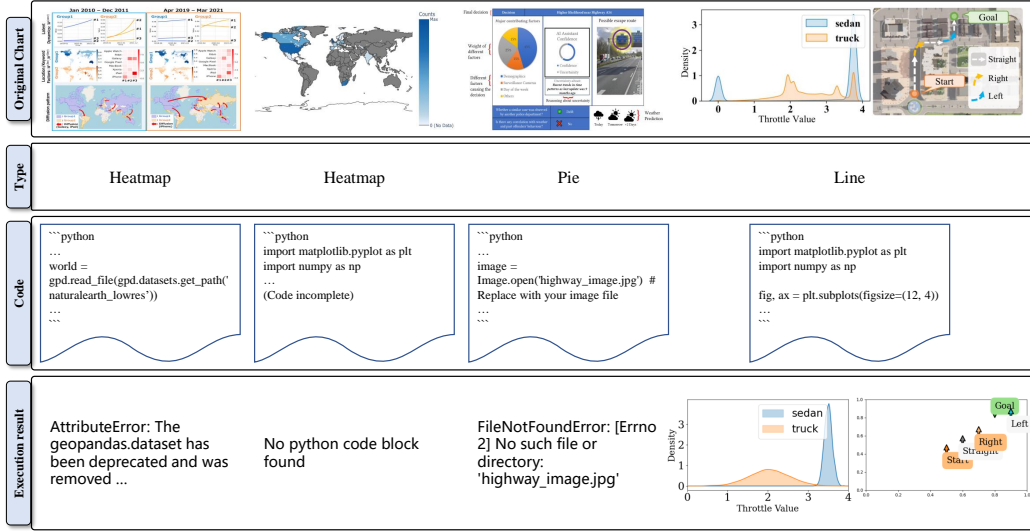

Figure A: Examples of misclassified chart images. Each column shows: the original image (Higashiguchi et al., 2025; Olson et al., 2025; Mehrotra et al., 2025; Shin et al., 2024), assigned chart type, extracted code, and code execution result. Most misclassified cases either fail to execute due to missing files or code errors, ensuring they are filtered out at the code validation stage.

054  
055  
056  
057  
058  
059  
060  
061  
062  
063  
064  
065  
066  
067  
068  
069  
070  
071  
072  
073  
074  
075  
076  
077  
078  
079  
080  
081  
082  
083  
084  
085  
086  
087  
088  
089  
090  
091  
092  
093  
094  
095  
096  
097  
098  
099  
100  
101  
102  
103  
104  
105  
106  
107

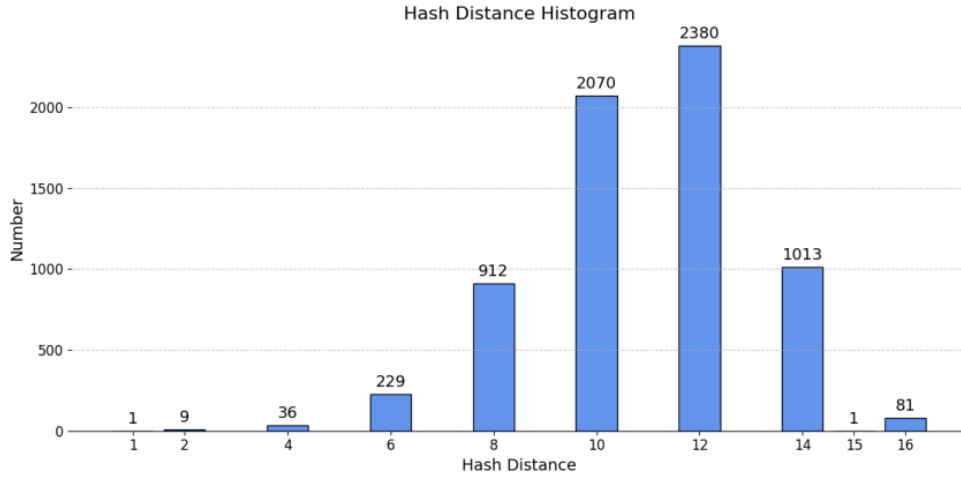

(a)

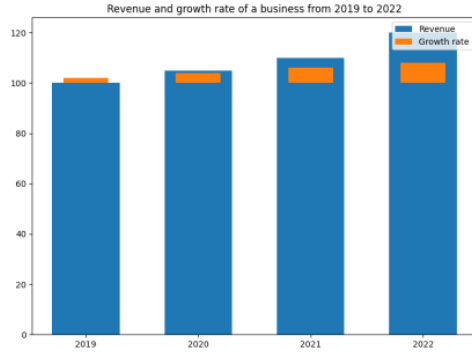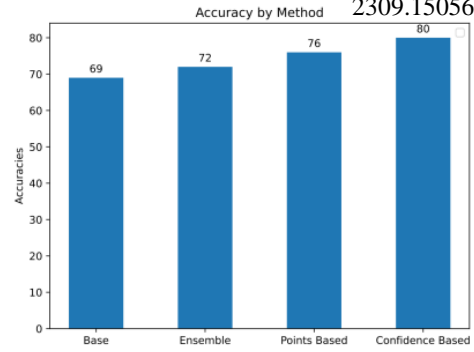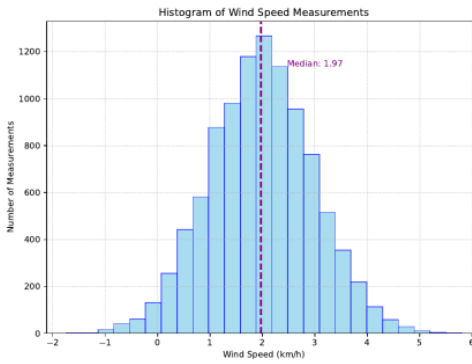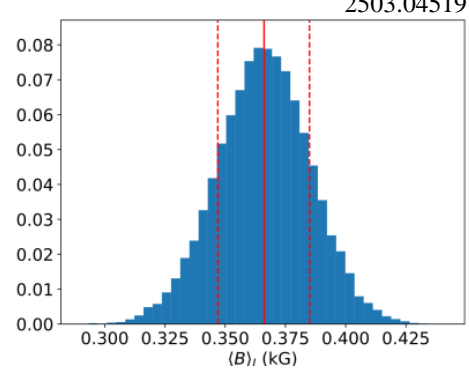

(b)

Figure B: (a) Histogram of minimum hash distances between each test image and its most similar chart (Silver et al., 2022; Hahlin et al., 2025) in the 288,992 charts set, indicating no near-duplicate images. (b) Examples of test images and their closest charts with hash distance 1–2, showing that even the most similar samples are visually distinct.

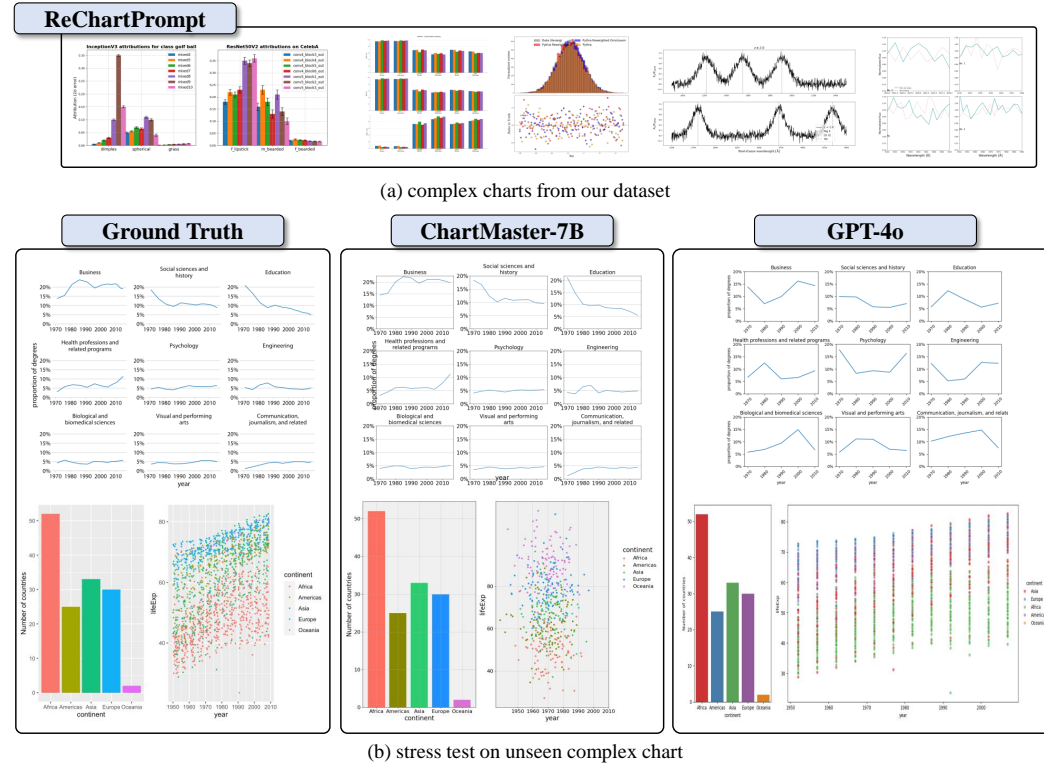

Figure C: (a) Examples of complex charts in the ReChartPrompt-240K dataset, illustrating the diversity and difficulty beyond simple chart types. (b) Stress test results on manually collected complex charts. ChartMaster-7B demonstrates strong generalization and visual consistency, successfully reconstructing multi-panel and faceted charts, and outperforming GPT-4o in structure fidelity.

## REFERENCES

- A Hahlin, O Kochukhov, P Chaturvedi, E Guenther, A Hatzes, Ulrike Heiter, A Lavail, Evangelos Nagel, N Piskunov, K Pouilly, et al. Comparative study of small-scale magnetic fields on  $\xi$  boo a using optical and near-infrared spectroscopy. *Astronomy & Astrophysics*, 696:A4, 2025.
- Shingo Higashiguchi, Yasuko Matsubara, Koki Kawabata, Taichi Murayama, and Yasushi Sakurai. D-tracker: Modeling interest diffusion in social activity tensor data streams. *arXiv preprint arXiv:2505.00242*, 2025.
- Siddharth Mehrotra, Ujwal Gadiraju, Eva Bittner, Folkert van Delden, Catholijn M. Jonker, and Myrthe L. Tielman. “even explanations will not help in trusting [this] fundamentally biased system”: A predictive policing case-study. In *Proceedings of the 33rd ACM Conference on User Modeling, Adaptation and Personalization*, pp. 51–62, 2025.
- Lauren Olson, Ricarda Anna-Lena Fischer, Florian Kunneman, and Emitzá Guzmán. Who speaks for ethics? how demographics shape ethical advocacy in software development. In *Proceedings of the 2025 ACM Conference on Fairness, Accountability, and Transparency*, pp. 2847–2862, 2025.
- Sangwoo Shin, Minjong Yoo, Jeongwoo Lee, and Honguk Woo. Semtra: A semantic skill translator for cross-domain zero-shot policy adaptation. In *Proceedings of the AAAI Conference on Artificial Intelligence*, volume 38, pp. 15000–15008, 2024.
- Daniel Silver, Tirthak Patel, and Devesh Tiwari. Quilt: Effective multi-class classification on quantum computers using an ensemble of diverse quantum classifiers. In *Proceedings of the AAAI Conference on Artificial Intelligence*, volume 36, pp. 8324–8332, 2022.
